# Supplementary material for: Charting pathways to climate change mitigation in a coupled socio-climate model
Source: PubMed Central journal article supplement (PMC6553685; doi:10.1371/journal.pcbi.1007000), 2019-06-06
Supplement: pcbi.1007000.s002.pdf [file pcbi.1007000.s002.pdf]

| Variable / Process | Definition                                              | Unit   |
|--------------------|---------------------------------------------------------|--------|
| $x$                | proportion of mitigators in population                  | 1      |
| $C_{\text{at}}$    | deviation of atmospheric CO2 (from pre-industrial 1800) | GtC    |
| $C_{\text{oc}}$    | deviation of CO2 in ocean                               | GtC    |
| $C_{\text{veg}}$   | deviation in CO2 in vegetation                          | GtC    |
| $C_{\text{so}}$    | deviation in CO2 in soil                                | GtC    |
| $T$                | deviation in temperature                                | K      |
| $\epsilon(t)$      | CO <sub>2</sub> emissions in absence of mitigation      | GtC/yr |
| $P$                | carbon uptake from photosynthesis                       | GtC/yr |
| $R_{\text{veg}}$   | respiration from vegetation                             | GtC/yr |
| $R_{\text{so}}$    | respiration from soil                                   | GtC/yr |
| $F_{\text{oc}}$    | flux of CO2 from atmosphere to ocean                    | GtC/yr |

Table 1: Labels for state variables and dynamic processes in the socio-climate model.
