# Supplementary material for: Charting pathways to climate change mitigation in a coupled socio-climate model
Source: PubMed Central journal article supplement (PMC6553685; doi:10.1371/journal.pcbi.1007000), 2019-06-06
Supplement: pcbi.1007000.s003.pdf [file pcbi.1007000.s003.pdf]

| Parameter           | Definition                                       | Baseline values / intervals         | Unit                                | Source     |
|---------------------|--------------------------------------------------|-------------------------------------|-------------------------------------|------------|
| $C_{at0}$           | initial CO <sub>2</sub> in atmosphere            | (590, 596, 602)                     | GtC                                 | [4, 6]     |
| $C_{ao0}$           | initial CO <sub>2</sub> in ocean reservoir       | $(1.4, 1.5, 1.6) \times 10^5$       | GtC                                 | [7]        |
| $C_{veg0}$          | initial CO <sub>2</sub> in vegetation reservoir  | (540, 550, 560)                     | GtC                                 | [4, 6]     |
| $C_{veg0}$          | initial CO <sub>2</sub> in soil reservoir        | (1480, 1500, 1520)                  | GtC                                 | [4, 6]     |
| $T_0$               | initial average atmospheric temperature          | (288, 288.15, 288.3)                | K                                   | [6]        |
| $k_p$               | photosynthesis rate constant                     | (0.175, 0.184, 0.193)               | yr <sup>-1</sup>                    | [4, 6]     |
| $k_{MM}$            | photosynthesis normalising constant              | 1.478                               | 1                                   | [6]        |
| $k_c$               | photosynthesis compensation point                | $(26, 29, 32) \times 10^{-6}$       | 1                                   | [3, 6]     |
| $K_M$               | half-saturation point for photosynthesis         | $(108, 120, 132) \times 10^{-6}$    | 1                                   | [6]        |
| $k_a$               | mole volume of atmosphere                        | $1.773 \times 10^{20}$              | moles                               | [6, 9]     |
| $k_r$               | plant respiration constant                       | (0.0828, 0.092, 0.1012)             | yr <sup>-1</sup>                    | [4, 6]     |
| $k_A$               | plant respiration normalising constant           | $8.7039 \times 10^9$                | 1                                   | [6]        |
| $E_a$               | plant respiration activation energy              | (54.63, 54.83, 55.03)               | J mol <sup>-1</sup>                 | [2, 6]     |
| $k_{sr}$            | soil respiration rate constant                   | (0.0303, 0.034, 0.037)              | yr <sup>-1</sup>                    | [4, 6]     |
| $k_B$               | soil respiration normalising constant            | 157.072                             | 1                                   | [6]        |
| $k_t$               | turnover rate constant                           | (0.0828, 0.092, 0.1012)             | yr <sup>-1</sup>                    | [4, 6]     |
| $c$                 | specific heat capacity of Earth's surface        | $(4.22, 4.69, 5.16) \times 10^{23}$ | JK <sup>-1</sup>                    | [4, 6]     |
| $a_E$               | Earth's surface area                             | $5.101 \times 10^{14}$              | m <sup>2</sup>                      | universal  |
| $\sigma$            | Stefan-Boltzman constant                         | $5.67 \times 10^{-8}$               | Wm <sup>-2</sup> K <sup>-4</sup>    | universal  |
| $L$                 | latent heat per mole of water                    | 43 655                              | mol <sup>-1</sup>                   | universal  |
| $R$                 | molar gas constant                               | 8.314                               | J mol <sup>-1</sup> K <sup>-1</sup> | universal  |
| $H$                 | relative humidity                                | 0.5915                              | 1                                   | calibrated |
| $A$                 | surface albedo                                   | (0.203, 0.225, 0.248)               | yr <sup>-1</sup>                    | [5, 6]     |
| $S$                 | solar flux                                       | (1231, 1368, 1504)                  | Wm <sup>-2</sup>                    | [5, 6]     |
| $\tau(\text{CH}_4)$ | methane opacity                                  | (0.0208, 0.0231, 0.0254)            | 1                                   | [1, 6]     |
| $P_0$               | water vapor saturation constant                  | $(1.26, 1.4, 1.54) \times 10^{11}$  | Pa                                  | [6, 8]     |
| $F_0$               | ocean flux rate constant                         | $(2.25, 2.5, 2.75) \times 10^{-2}$  | yr <sup>-1</sup>                    | [7]        |
| $\chi$              | characteristic CO <sub>2</sub> solubility        | (0.2, 0.3, 0.4)                     | 1                                   | calibrated |
| $\zeta$             | evasion factor                                   | (40, 50, 60)                        | 1                                   | calibrated |
| $\kappa$            | social learning rate                             | (0.02, 0.05, 0.2)                   | yr <sup>-1</sup>                    | -          |
| $\beta$             | net cost of mitigation                           | (0.5, 1, 1.5)                       | 1                                   | -          |
| $\delta$            | strength of social norms                         | (0.5, 1, 1.5)                       | 1                                   | -          |
| $f_{\max}$          | maximum of warming cost function $f(T)$          | (4, 5, 6)                           | 1                                   | -          |
| $\omega$            | nonlinearity of warming cost function $f(T)$     | (1, 3, 5)                           | K <sup>-1</sup>                     | -          |
| $T_c$               | critical temperature of $f(T)$                   | (2.4, 2.5, 2.6)                     | K                                   | -          |
| $t_p$               | # previous years used for temperature projection | 10                                  | yr                                  | -          |
| $t_f$               | # years ahead for temperature projection         | (0, 25, 50)                         | yr                                  | -          |
| $s$                 | half-saturation time for $\epsilon(t)$ from 2014 | (30, 50, 70)                        | yr                                  | -          |
| $\epsilon_{\max}$   | maximum change in $\epsilon(t)$ from 2014        | (4.2, 7, 9.8)                       | GtC yr <sup>-1</sup>                | -          |
| $x_0$               | initial proportion of mitigators                 | (0.01, 0.05, 0.1)                   | 1                                   | -          |

Table 1: **Definitions and values for the parameters in the socio-climate model.** Parameters values given as a tuple provide the lower bound, baseline, and upper bound values respectively.

## References

- [1] Jérôme Chappellaz, JM Barnola, D Raynaud, Ye S Korotkevich, and C Lorius. Ice-core record of atmospheric methane over the past 160,000 years. *Nature*, 345(6271):127, 1990.
- [2] AD Friend, AK Stevens, RG Knox, and MGR Cannell. A process-based, terrestrial biosphere model of ecosystem dynamics (hybrid v3. 0). *Ecological Modelling*, 95(2-3):249–287, 1997.
- [3] Roger M Gifford. Implications of co<sub>2</sub> effects on vegetation for the global carbon budget. In *The global carbon cycle*, pages 159–199. Springer, 1993.
- [4] John T Houghton. *Climate change 1995: The science of climate change: contribution of working group I to the second assessment report of the Intergovernmental Panel on Climate Change*, volume 2. Cambridge University Press, 1996.
- [5] James F Kasting, Daniel P Whitmire, and Ray T Reynolds. Habitable zones around main sequence stars. *Icarus*, 101(1):108–128, 1993.
- [6] Timothy M Lenton. Land and ocean carbon cycle feedback effects on global warming in a simple earth system model. *Tellus B: Chemical and Physical Meteorology*, 52(5):1159–1188, 2000.
- [7] KE Muryshev, AV Eliseev, II Mokhov, and AV Timazhev. A lag between temperature and atmospheric co<sub>2</sub> concentration based on a simple coupled model of climate and the carbon cycle. In *Doklady Earth Sciences*, volume 463, pages 863–867. Springer, 2015.
- [8] Shinichi Nakajima, Yoshi-Yuki Hayashi, and Yutaka Abe. A study on the “runaway greenhouse effect” with a one-dimensional radiative–convective equilibrium model. *Journal of the Atmospheric Sciences*, 49(23):2256–2266, 1992.
- [9] JR Toggweiler and Jorge L Sarmiento. Glacial to interglacial changes in atmospheric carbon dioxide: The critical role of ocean surface water in high latitudes. *The carbon cycle and atmospheric CO<sub>2</sub>: natural variations archean to present*, 32:163–184, 1985.
